# Supplementary material for: Effects of Poty-Potexvirus Synergism on Growth, Photosynthesis and Metabolite Status of Nicotiana benthamiana
Source: MDPI journal article supplement (doi:10.3390/v15010121), 2022-12-30
Supplement: s1 [file s1]

**Table S2** Effect of single and mixed PVA and PVX infections on selected photosynthetic parameters during light adaptation (L1-4) and light-adapted steady state (Lss) at the end point of the experiment, 10 dpi.  $\Phi$ PSII = Photosystem II operating efficiency, NPQ = non-photochemical quenching, Rfd = Ratio of fluorescence decline, plant vitality factor/CO<sub>2</sub> fixation. Results are averages of one phenotyping experiment, sd signifies standard deviation and Student's t-test was used to calculate statistical significance (NS= not significant, \* = P<0.05, \*\* = P<0.01, \*\*\* P<0.001).

| <i>Light adaptation</i> |           | <i>L1, 8 s</i>          |      |                         | <i>L2, 18 s</i>         |      |                         | <i>L3, 28 s</i>         |      |                         | <i>L4, 48 s</i>         |      |                         | <i>Lss, 68 s</i>        |      |                         |
|-------------------------|-----------|-------------------------|------|-------------------------|-------------------------|------|-------------------------|-------------------------|------|-------------------------|-------------------------|------|-------------------------|-------------------------|------|-------------------------|
| <i>PSII parameter</i>   | treatment | % difference to control | sd   | t-test and significance | % difference to control | sd   | t-test and significance | % difference to control | sd   | t-test and significance | % difference to control | sd   | t-test and significance | % difference to control | sd   | t-test and significance |
| <b><i>ΦPSII</i></b>     | CTRL      | 0,0                     | 3,8  |                         | 0,0                     | 4,9  |                         | 0,0                     | 2,2  |                         | 0,0                     | 3,3  |                         | 0,0                     | 3,4  |                         |
|                         | PVA       | -11,2                   | 8,4  | 6,8E-03 **              | -1,7                    | 8,6  | 6,2E-01 NS              | -2,0                    | 4,8  | 3,0E-01 NS              | -1,1                    | 3,8  | 5,2E-01 NS              | -0,6                    | 3,3  | 7,0E-01 NS              |
|                         | PVX       | -1,7                    | 4,5  | 4,2E-01 NS              | 1,6                     | 4,2  | 4,9E-01 NS              | 2,5                     | 3,4  | 9,5E-02 NS              | 2,2                     | 5,0  | 2,1E-01 NS              | 1,9                     | 3,2  | 2,5E-01 NS              |
|                         | PVA+PVX   | -6,6                    | 7,3  | 3,4E-02 *               | -17,2                   | 3,6  | 4,5E-07 ***             | -12,3                   | 4,2  | 4,7E-06 ***             | -7,7                    | 3,7  | 1,9E-03 **              | -5,7                    | 5,3  | 1,7E-02 *               |
| <b><i>NPQ</i></b>       | CTRL      | 0,0                     | 8,7  |                         | 0,0                     | 8,9  |                         | 0,0                     | 7,3  |                         | 0,0                     | 7,0  |                         | 0,0                     | 8,5  |                         |
|                         | PVA       | -14,0                   | 6,6  | 1,9E-03 **              | -12,2                   | 7,6  | 8,0E-03 **              | -5,7                    | 7,8  | 1,4E-01 NS              | 2,4                     | 7,0  | 4,9E-01 NS              | 6,3                     | 13,7 | 2,8E-01 NS              |
|                         | PVX       | -5,7                    | 8,0  | 1,8E-01 NS              | 4,3                     | 9,8  | 3,6E-01 NS              | 4,3                     | 8,3  | 2,8E-01 NS              | 4,2                     | 9,1  | 3,1E-01 NS              | 4,6                     | 16,1 | 4,8E-01 NS              |
|                         | PVA+PVX   | -15,0                   | 7,9  | 1,4E-03 **              | -23,8                   | 11,8 | 2,2E-04 ***             | -23,8                   | 12,9 | 3,6E-04 ***             | -3,9                    | 10,4 | 3,7E-01 NS              | 8,6                     | 7,2  | 3,5E-02 *               |
| <b><i>Rfd</i></b>       | CTRL      | 0,0                     | 10,2 |                         | 0,0                     | 5,6  |                         | 0,0                     | 4,6  |                         | 0,0                     | 6,5  |                         | 0,0                     | 7,5  |                         |
|                         | PVA       | -17,3                   | 14,1 | 1,3E-02 *               | -1,6                    | 15,8 | 7,9E-01 NS              | -0,4                    | 10,9 | 9,3E-01 NS              | 4,9                     | 7,1  | 1,6E-01 NS              | 7,0                     | 7,7  | 7,7E-02 NS              |
|                         | PVX       | -4,4                    | 14,3 | 4,9E-01 NS              | 6,1                     | 12,5 | 2,3E-01 NS              | 8,0                     | 11,9 | 1,1E-01 NS              | 7,8                     | 6,9  | 3,1E-02 *               | 7,4                     | 7,4  | 5,8E-02 NS              |
|                         | PVA+PVX   | -8,9                    | 14,9 | 1,6E-01 NS              | -31,3                   | 5,9  | 3,6E-09 ***             | -24,9                   | 11,4 | 9,2E-05 ***             | -8,3                    | 11,9 | 9,0E-02 NS              | -0,5                    | 10,9 | 9,1E-01 NS              |
