# Supplementary material for: Effects of Poty-Potexvirus Synergism on Growth, Photosynthesis and Metabolite Status of Nicotiana benthamiana
Source: MDPI journal article supplement (doi:10.3390/v15010121), 2022-12-30
Supplement: s1 [file s1]

**Table S1** Ionization and transition parameters for UPLC- 6500+ QTRAP/MS analysis of methionine cycle metabolites

| DECLUSTERING<br>POTENTIAL<br>(DP) | ENTRANCE<br>POTENTIAL<br>(EP) | CURTAIN<br>GAS | COLLISION<br>GAS | ION SPRAY<br>VOLTAGE | TEMPERATURE<br>°C | ION SOURCE<br>GAS 1 | ION SOURCE<br>GAS 2 |
|-----------------------------------|-------------------------------|----------------|------------------|----------------------|-------------------|---------------------|---------------------|
| 5.0                               | 10.0                          | 20.0           | medium           | 4500                 | 450               | 10.0                | 10.0                |
